# Supplementary material for: An ultrastable large-area atomically flat 2D polymer dielectric for low-voltage flexible organic field-effect transistors
Source: Royal Society of Chemistry journal article supplement (doi:10.1039/d2tc05059e), 2023-01-01
Supplement: d2tc05059e1.pdf [file d2tc05059e1.pdf]

## **An Ultrastable Large-Area Atomically Flat 2D Polymer Dielectric for Low-Voltage Flexible Organic Field-Effect Transistors**

Jiamin Wang,<sup>a</sup> Jiangyan Yuan,<sup>a</sup> Bin Li,<sup>a</sup> Zhaofeng Wang,<sup>a</sup> Chunli Ma,<sup>a</sup> Shuyuan Yang,<sup>a</sup> Jiarong Yao,<sup>a</sup> Yiwen Ren,<sup>a</sup> Xianshuo Wu,<sup>a</sup> Shengbin Lei,<sup>a</sup> Fangxu Yang,<sup>a\*</sup> Rongjin Li,<sup>a\*</sup> and Wenping Hu<sup>ab</sup>

<sup>a</sup> *Tianjin Key Laboratory of Molecular Optoelectronic Sciences, Department of Chemistry, School of Science, Tianjin University & Collaborative Innovation Center of Chemical Science and Engineering (Tianjin), Tianjin 300072, China*

<sup>b</sup> *Joint School of National University of Singapore and Tianjin University, Fuzhou International Campus of Tianjin University, Binhai New City, Fuzhou 350207, China*

[\*] Corresponding Authors: [yangfangxu@tju.edu.cn](mailto:yangfangxu@tju.edu.cn), [lirj@tju.edu.cn](mailto:lirj@tju.edu.cn)

## Electronic Supplemental Information

### Table S1: Properties and applications of recently developed 2DP films

#### Figures S1 to S4: Synthesis of the poly-TT 2DP Film

#### Figures S5 to S7: Structural Characterization and Stability of the poly-TT 2DP Film

#### Figures S8 to S12: Electric properties of poly-TT 2DP film and flexible OFETs

#### References

Table S1 Properties and applications of recently developed 2DP films.

| Ref.      | Synthesis method        | Size       | Thickness        | RMS<br>[nm] | Support                        | Reaction times | Application         |
|-----------|-------------------------|------------|------------------|-------------|--------------------------------|----------------|---------------------|
| 1         | direct synthesis        | centimeter | 25 nm            | N/A         | ITO/glass                      | 3 days         | resistive memory    |
| 2         | air-liquid interface    | 4-inch     | 70 nm            | N/A         | N/A                            | 5 days         | N/A                 |
| 3         | air-liquid interface    | centimeter | 30 nm            | 1.5         | N/A                            | 48 h           | memristor           |
| 4         | air-liquid interface    | wafer      | 25 nm            | 0.61        | N/A                            | 24 h           | memristor           |
| 5         | precursor deposition    | N/A        | N/A              | N/A         | Au (111)                       | N/A            | catalysis           |
| 6         | spin-coating            | N/A        | 27 nm            | 4           | N/A                            | N/A            | solar cell          |
| 7         | air-liquid interface    | wafer      | 2.5-46 nm        | N/A         | N/A                            | 24 h           | OFET (active layer) |
| 8         | liquid-liquid interface | N/A        | 20 $\mu\text{m}$ | N/A         | N/A                            | 3 days         | dielectric          |
| 9         | direct synthesis        | wafer      | 20 nm            | 0.70        | graphene<br>/ MoS <sub>2</sub> | 12 h           | dielectric          |
| this work | air-liquid interface    | centimeter | 15 nm            | 0.69        | N/A                            | 24 h           | OFET (dielectric)   |

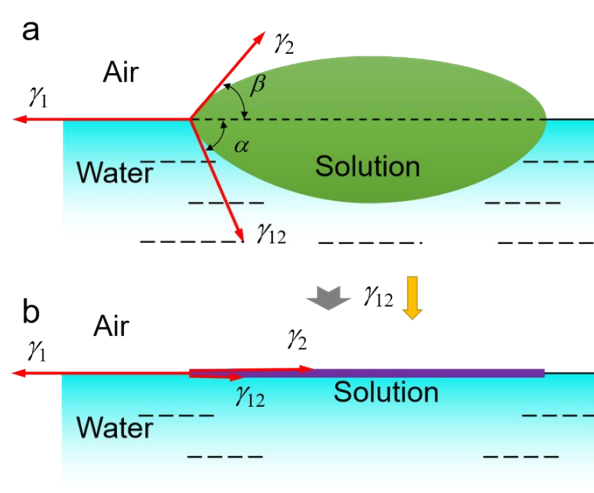

Fig. S1 Balancing of surface tension at air-liquid interface with (a) pure chloroform (b) mix solvents.  $\gamma_1$ ,  $\gamma_2$  are the surface tensions of the water and solution, respectively, and  $\gamma_{12}$  is the interfacial surface tension of the two phases.

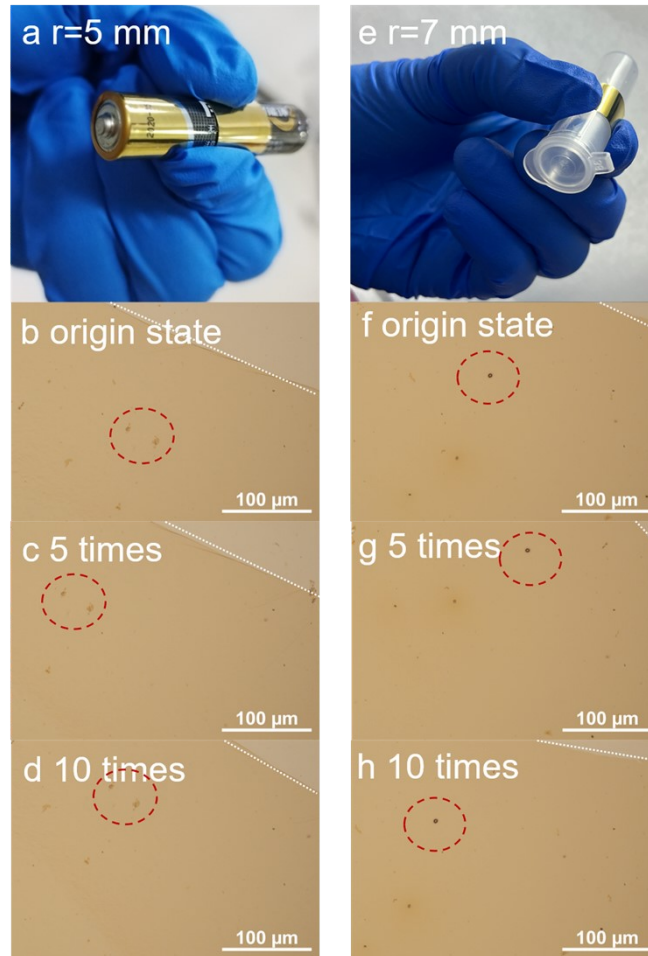

**Fig. S2** Photographs of the poly-TT 2DP film being bent (a, e) and the optical microscopy after different bending radius of  $r = 5$  mm (b, c, d) and  $r = 7$  mm (f, g, h).

To measure the mechanical strength quantitative, we transferred the 2DP film (15 nm in thickness) to PEN substrate (125  $\mu\text{m}$  in thickness). The substrate carrying the 2DP film was then bent to a radius of 5mm and 7mm. The strains  $\epsilon$  were calculated according to the following equation:

$$\epsilon = \frac{h_s}{2r} \times 100$$

where  $r$  is the curvature radius,  $h_s$  is the substrate thickness (125  $\mu\text{m}$ ). Obviously, when the strain was 1.25% ( $r = 5$  mm) and 0.89% ( $r = 7$  mm), respectively, the film showed no cracks, which indicated the potential application as gate dielectrics in flexible electronics.

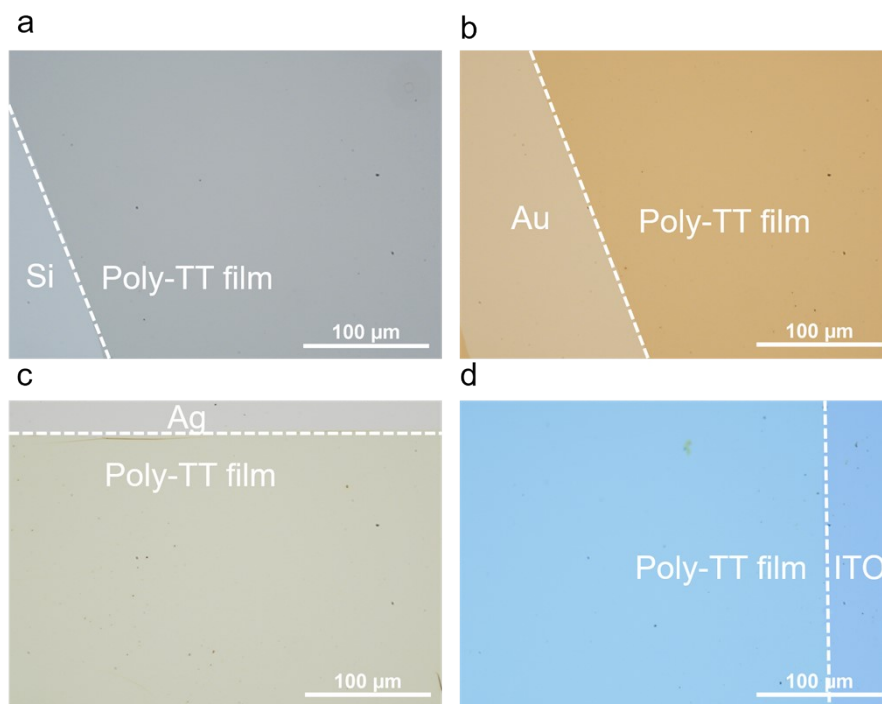

Fig. S3 poly-TT 2DP films transferred on various substrates. (a) Si (b) Au (c) Ag (d) ITO.

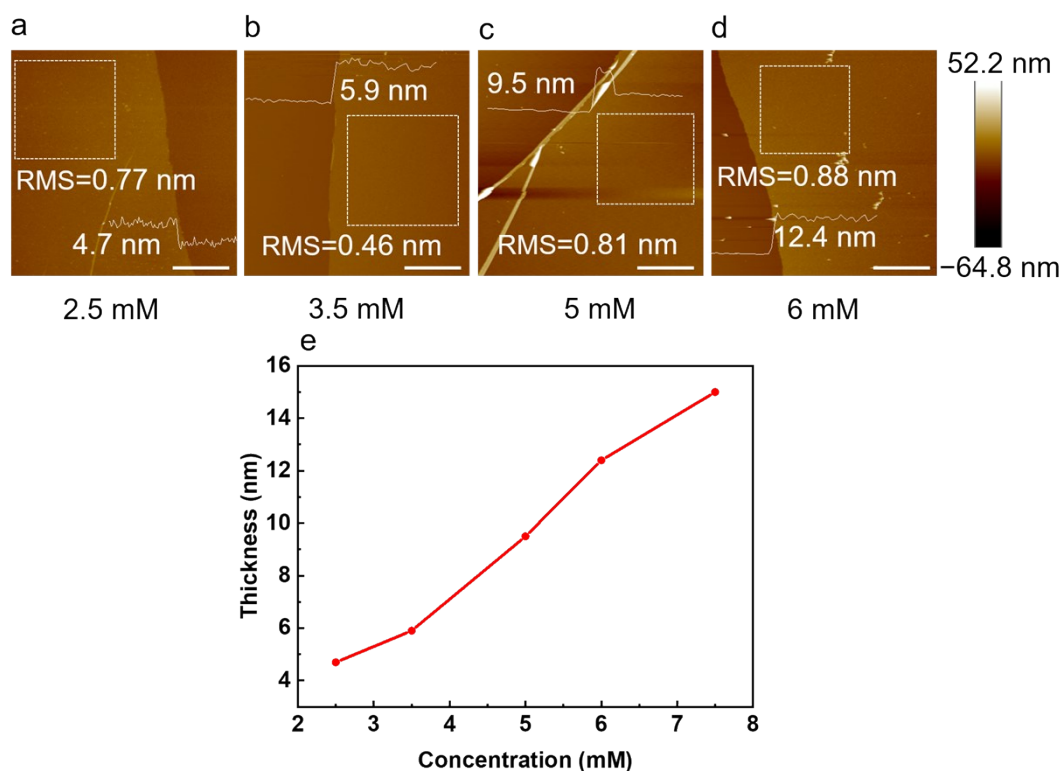

Fig. S4 (a-d) AFM images of poly-TT 2DP films with different TAPB monomer concentrations. (e) Graph of TAPB monomer concentration versus poly-TT 2DP film thickness. Scale bar, 5  $\mu$ m.

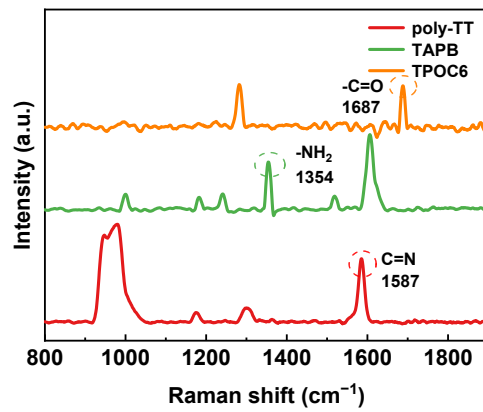

Fig. S5 Raman spectra of poly-TT 2DP film, TAPB and TPOC6.

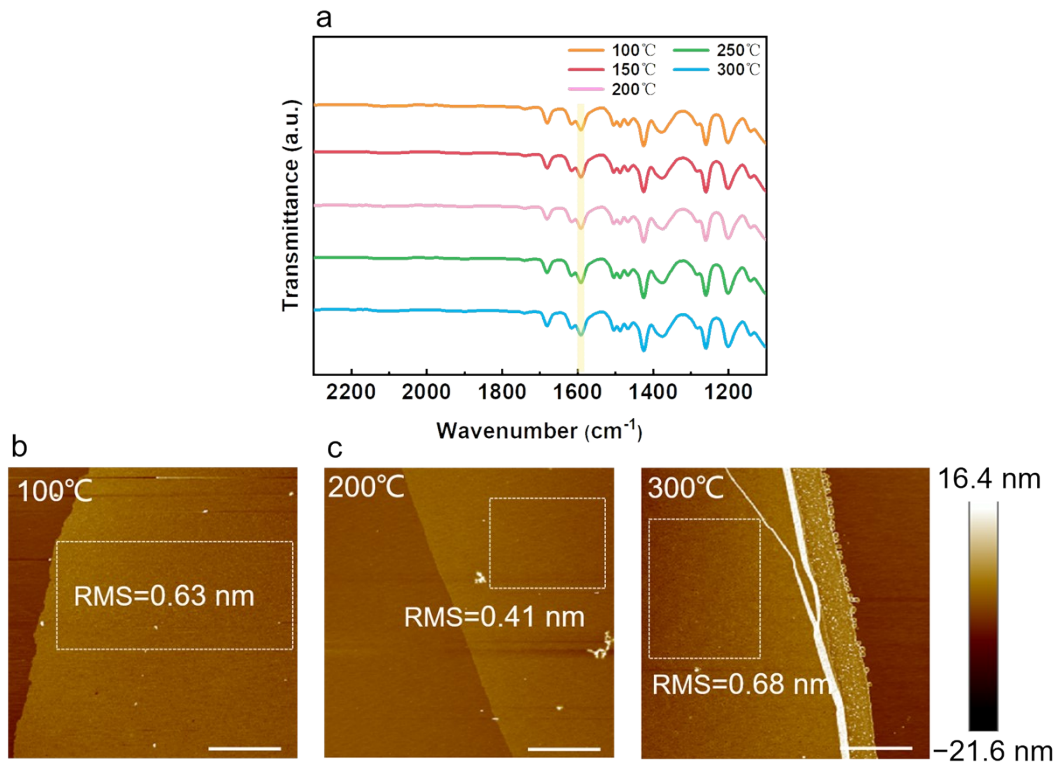

Fig. S6 (a) FTIR of poly-TT 2DP films, which were heated at various temperatures for 20 min, respectively. (b,c,d) AFM images of poly-TT 2DP films, which were heated at (b) 100 °C, (c) 200 °C, (d) 300 °C for 20 min. Scale bar, 5  $\mu$ m.

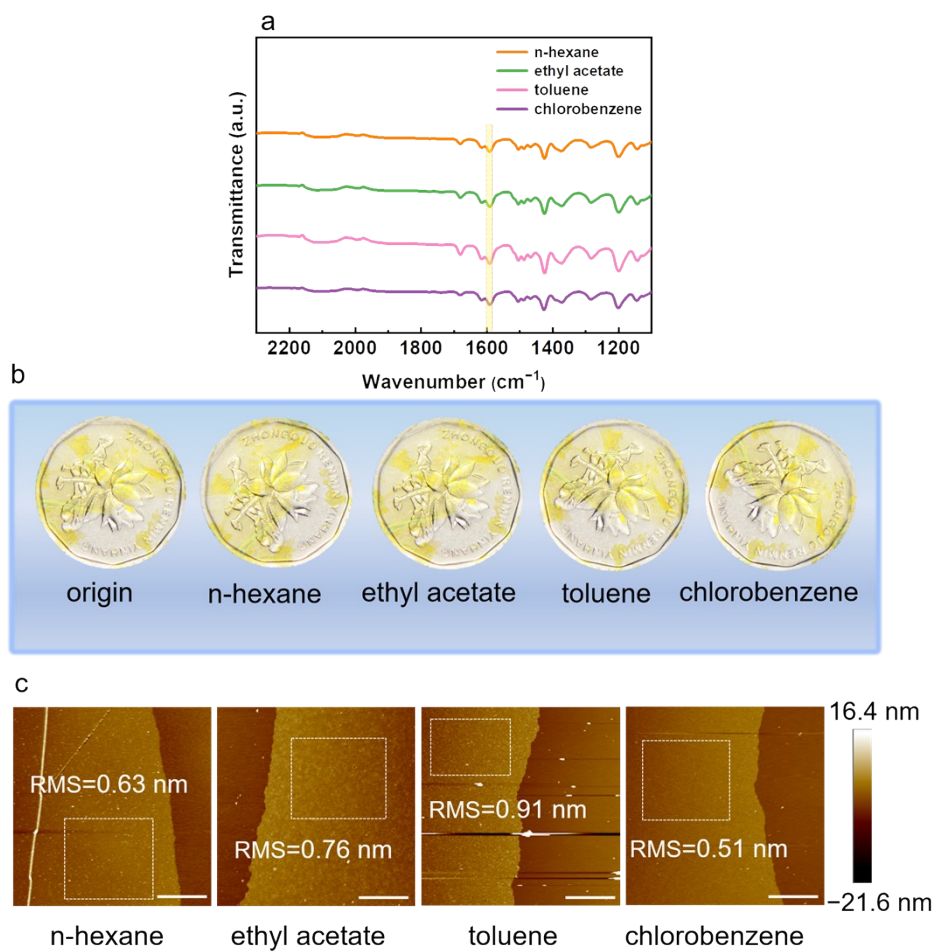

**Fig. S7** (a) FTIR, (b) digital images and (c) AFM images of poly-TT 2DP films after immersing in n-hexane, ethyl acetate, toluene and chlorobenzene for 12 h, respectively. Scale bar, 5  $\mu\text{m}$ .

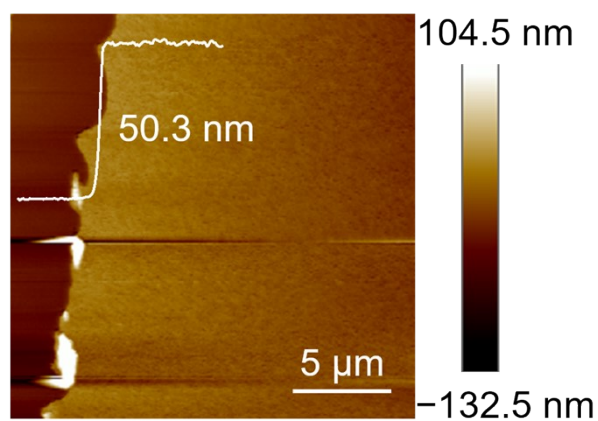

**Fig. S8** AFM image of the poly-TT 2DP film as dielectric layer in OFETs. Thick film of 50 nm was made by 6 consecutive transfers of the 8~9 nm 2DP grown by the air-liquid interfacial polymerization method.

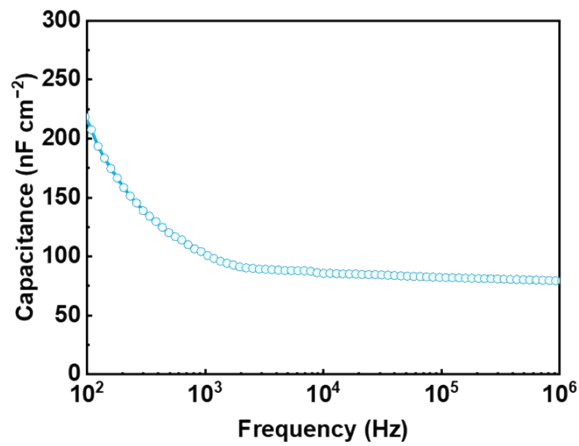

Fig. S9 Capacitance versus frequency (100 Hz~1 MHz) plot of poly-TT 2DP film.

Noting that the capacitance of MIMs at a frequency lower than  $10^4$  Hz tends to increase, which may arise from electric double-layer (EDL) polarization.<sup>10</sup> In Schiff base condensation reaction,  $\text{CH}_3\text{COOH}$  was added into the system as a catalyst, thus, traces of  $\text{CH}_3\text{COOH}$  might exist in the film. After applying electric field, the free ions moved toward the electrode, leading to the development of EDL polarization and the increase of the capacitance.

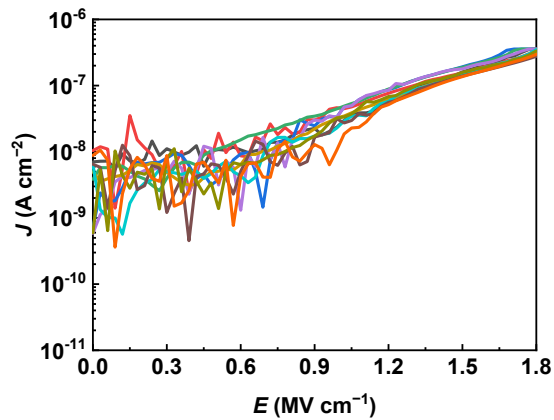

Fig. S10 Leakage current density of 10 MIM devices after heating at 300 °C for 20min.

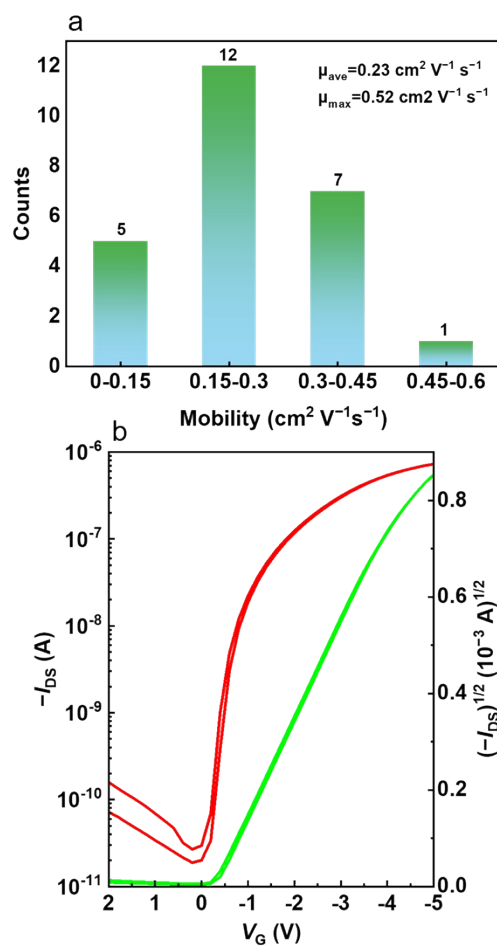

**Fig. S11** (a) Histogram of hole mobilities measured from 25 flexible OFETs. (b) Hysteresis characteristics of flexible OFET.

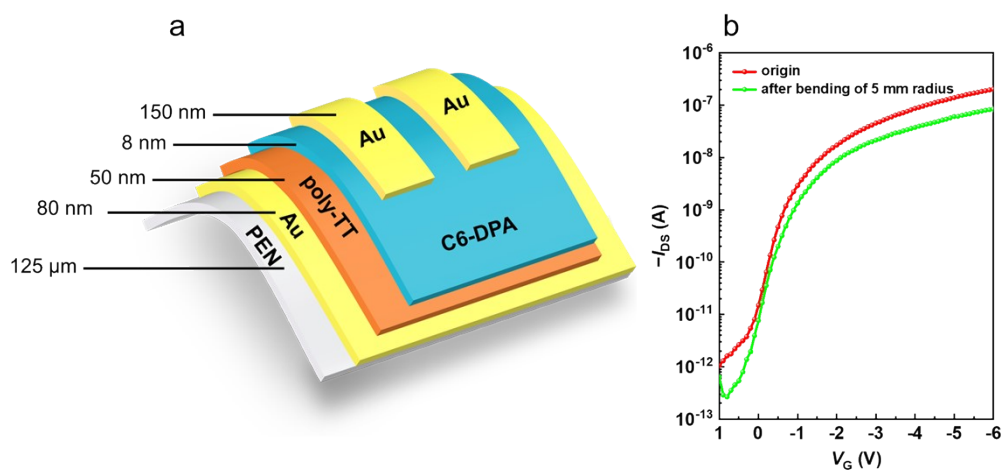

**Fig. 12** (a) Scheme of one flexible OFET. (b) Transfer curves for the flexible OFET before and after bending test.



## References

- 1 K. Chen, Y. Yin, C. Song, Z. Liu, X. Wang, Y. Wu, J. Zhang, J. Zhao, M. Tang, J. Liu, *Polymer* 2021, **230**, 124076.
- 2 H. Sahabudeen, H. Qi, M. Ballabio, M. Poloz˘ij, S. Olthof, R. Shivhare, Y. Jing, S. Park, K. Liu, T. Zhang, J. Ma, B. Rellinghaus, S. Mannsfeld, T. Heine, M. Bonn, E. C˘unovas, Z. Zheng, U. Kaiser, R. Dong, X. Feng, *Angew. Chem. Int. Ed.* 2020, **59**, 6028-6036.
- 3 Y. Song, G. Feng, L. Wu, E. Zhang, C. Sun, D. Fa, Q. Liang, S. Lei, X. Yu, W. Hu, *J. Mater. Chem. C* 2022, **10**, 2631-2638.
- 4 J. Liu, F. Yang, L. Cao, B. Li, K. Yuan, S. Lei, W. Hu, *Adv. Mater.* 2019, **31**, 1902264.
- 5 P. Alexa, J. M. Lombardi, P. Abufager, H. F. Busnengo, D. Grumelli, V. S. Vyas, F. Haase, B. V. Lotsch, R. Gutzler, K. Kern, *Angew. Chem. Int. Ed.* 2020, **59**, 8411-8415.
- 6 Q. Fu, Z. Xu, X. Tang, T. Liu, X. Dong, X. Zhang, N. Zheng, Z. Xie, Y. Liu, *ACS Energy Lett.* 2021, **6**, 1521-1532.
- 7 C. Li, Y. Wang, Y. Zou, X. Zhang, H. Dong, W. Hu, *Angew. Chem. Int. Ed.* 2020, **59**, 9403-9407.
- 8 P. Shao, J. Li, F. Chen, L. Ma, Q. Li, M. Zhang, J. Zhou, A. Yin, X. Feng, B. Wang, *Angew. Chem. Int. Ed.* 2018, **57**, 16501-16505.
- 9 A. M. Evans, A. Giri, V. K. Sangwan, S. Xun, M. Bartnof, C. G. Torres-Castanedo, H. B. Balch, M. S. Rahn, N. P. Bradshaw, E. Vitaku, D. W. Burke, H. Li, M. J. Bedzyk, F. Wang, J. L. Bredas, J. A. Malen, A. J. H. McGaughey, M. C. Hersam, W. R. Dichtel, P. E. Hopkins, *Nat. Mater.* 2021, **20**, 1142-1148.
- 10 B. Wang, W. Huang, L. Chi, M. Al-Hashimi, T. J. Marks, A. Facchetti, *Chem. Rev.* 2018, **118**, 5690-5754.
